# Supplementary material for: Intense up-conversion emission from Er3+/Yb3+ ion co-doped transparent oxyfluoride glass-ceramics containing Y5O4F7 nanorods for optical thermometry
Source: Royal Society of Chemistry journal article supplement (doi:10.1039/c9tc00280d), 2019-01-01
Supplement: c9tc00280d1.pdf [file c9tc00280d1.pdf]

## Electronic Supplementary Information

### Intense up-conversion emission from Er<sup>3+</sup>/Yb<sup>3+</sup> ions co-doped transparent oxyfluoride glass-ceramics containing Y<sub>5</sub>O<sub>4</sub>F<sub>7</sub> nanorods for optical thermometry

Zhiyong Zhao,<sup>a,b</sup> Kai Li,<sup>a</sup> Chao Liu,<sup>a,\*</sup> Qiaoyun Yin,<sup>a</sup> Jianjun Han,<sup>a</sup> Jong Heo<sup>b</sup>

<sup>a</sup> State Key Laboratory of Silicate Materials for Architectures, Wuhan

University of Technology, 122 Luoshi Road, Hongshan, Wuhan, Hubei

430070, P. R. China

<sup>b</sup> Department of Materials Science and Engineering, Pohang University of

Science and Technology (POSTECH), 77 Cheongam-Ro, Nam-gu, Pohang,

Gyeongbuk 790-784, Republic of Korea

\*Corresponding authors: Chao Liu (E-mail: [hite@whut.edu.cn](mailto:hite@whut.edu.cn))

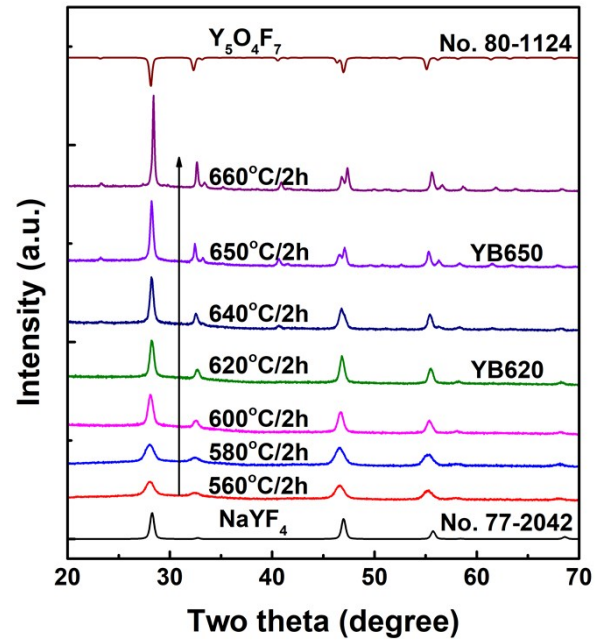

Fig. S1 X-ray diffraction patterns of glass-ceramics heat-treated at different temperatures for 2 h.
